# Supplementary material
Source: PubMed Central journal article supplement (PMC6179359)

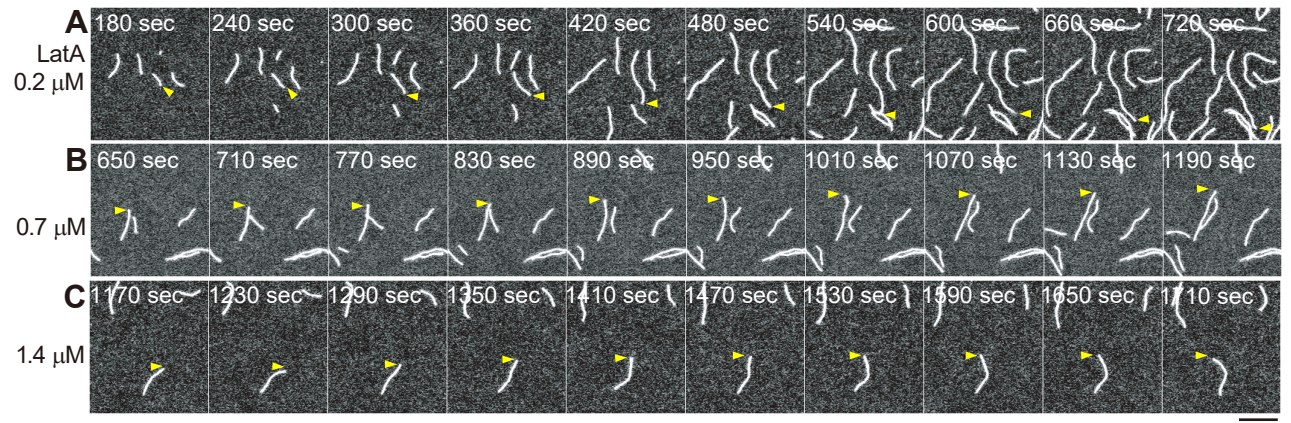

10  $\mu\text{m}$

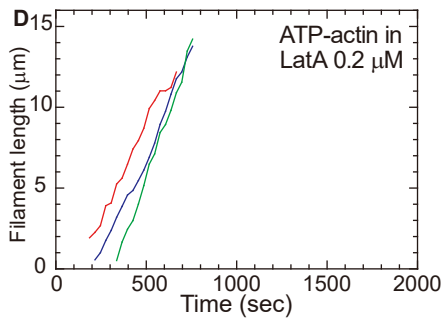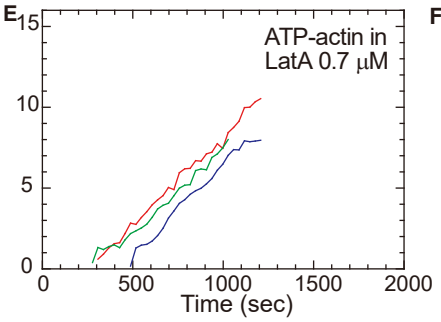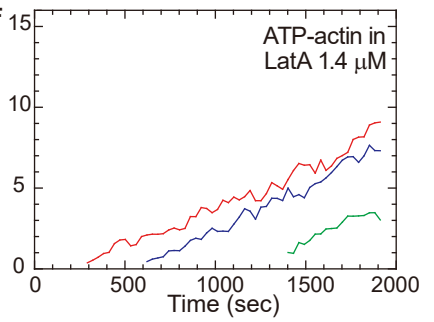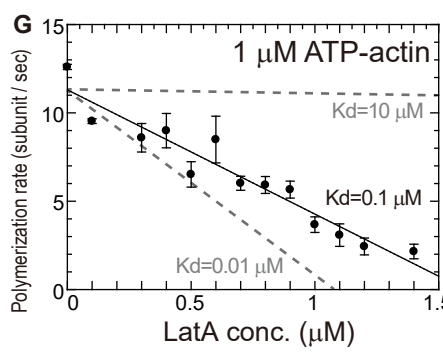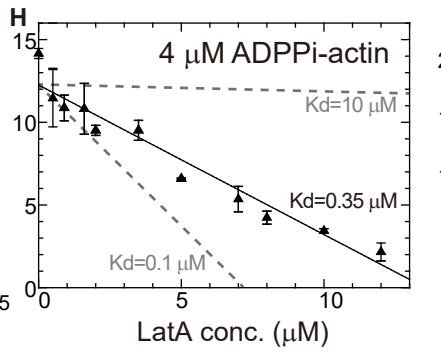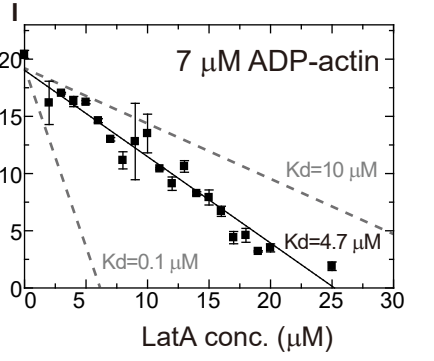

Supplement: NIHMS1507339-supplement-1.pdf [file NIHMS1507339-supplement-1.pdf]

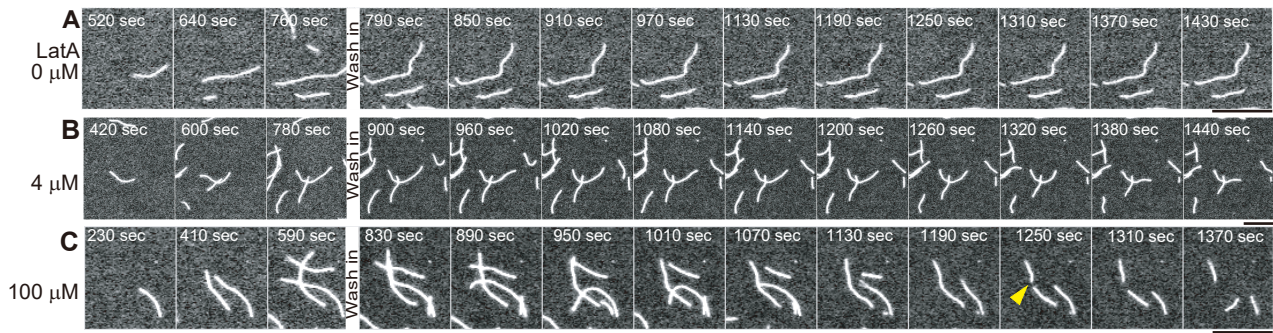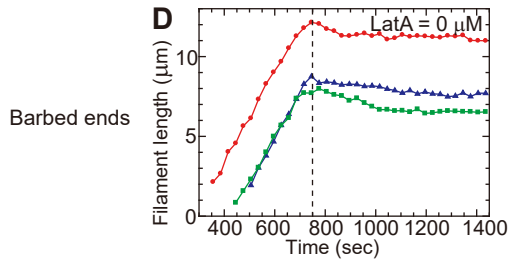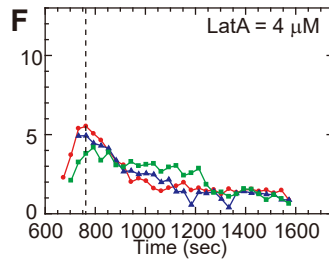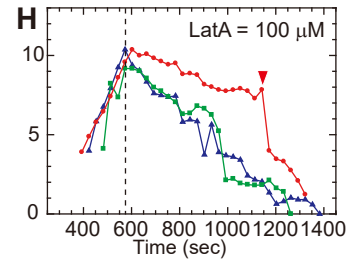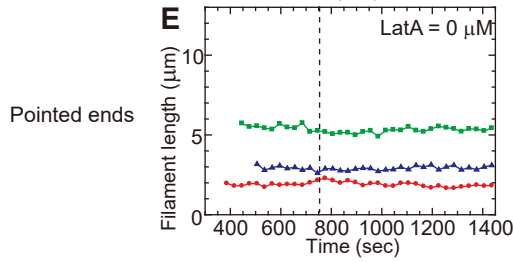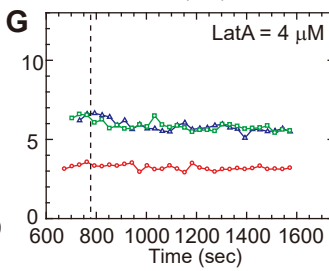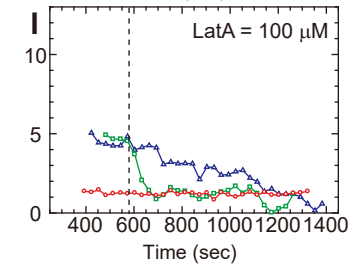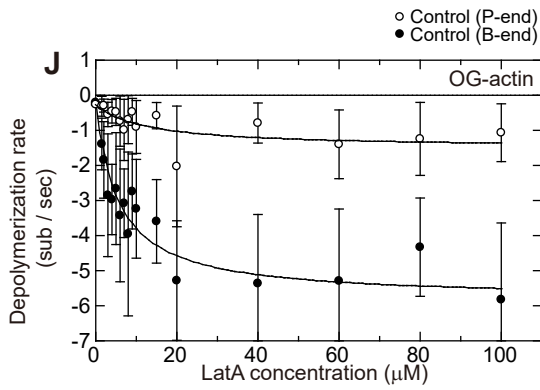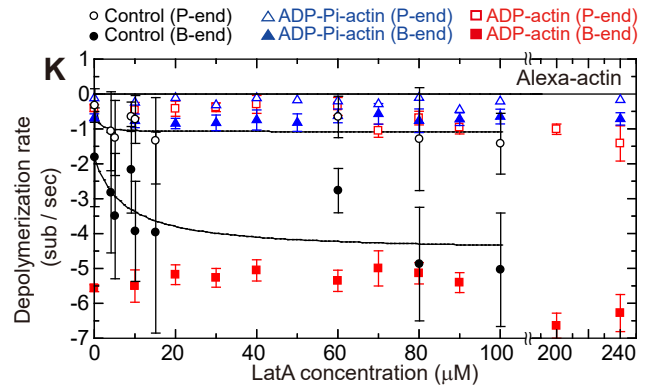

Supplement: NIHMS1507339-supplement-2.pdf [file NIHMS1507339-supplement-2.pdf]

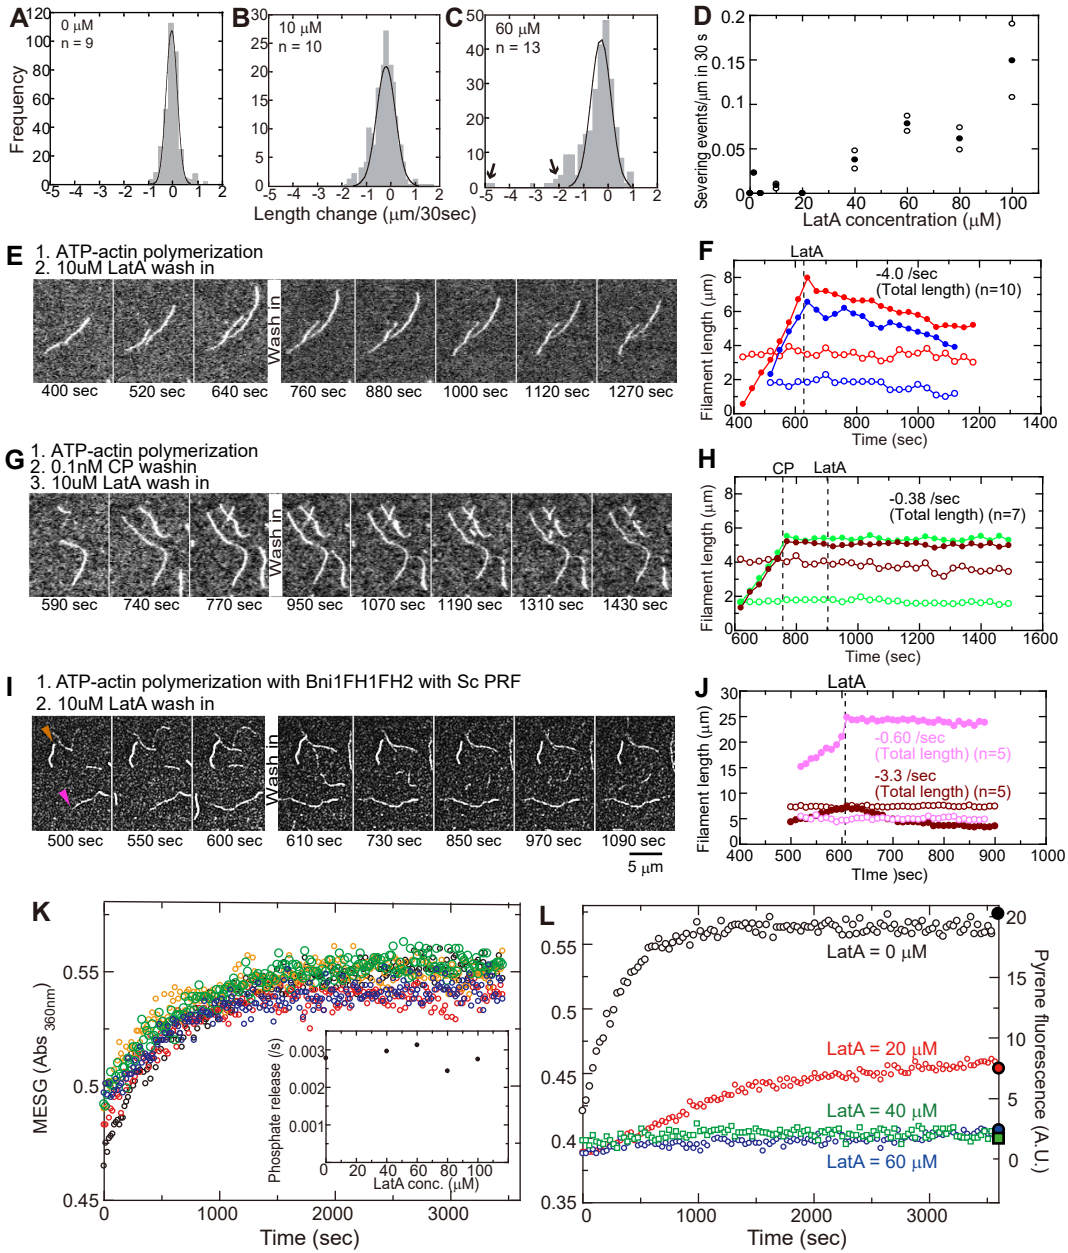

Supplement: NIHMS1507339-supplement-3.pdf [file NIHMS1507339-supplement-3.pdf]

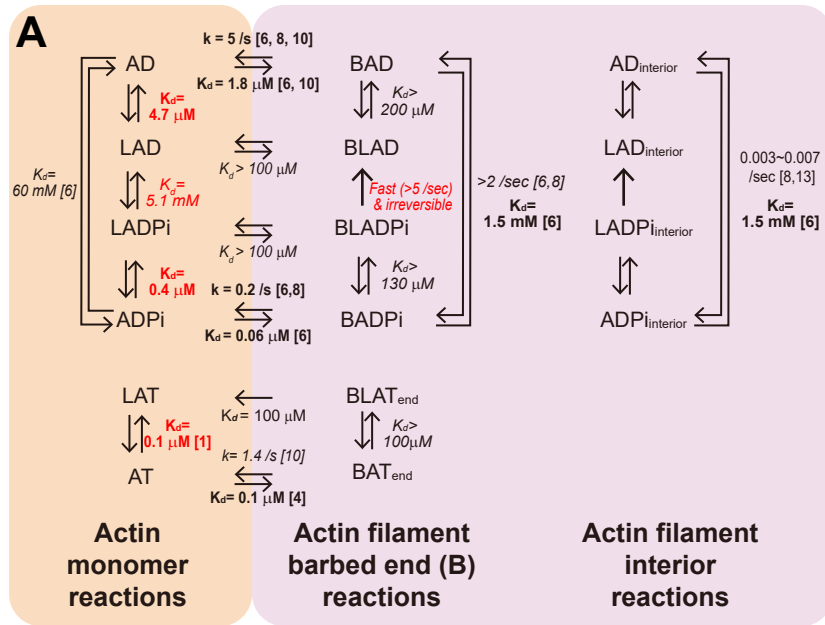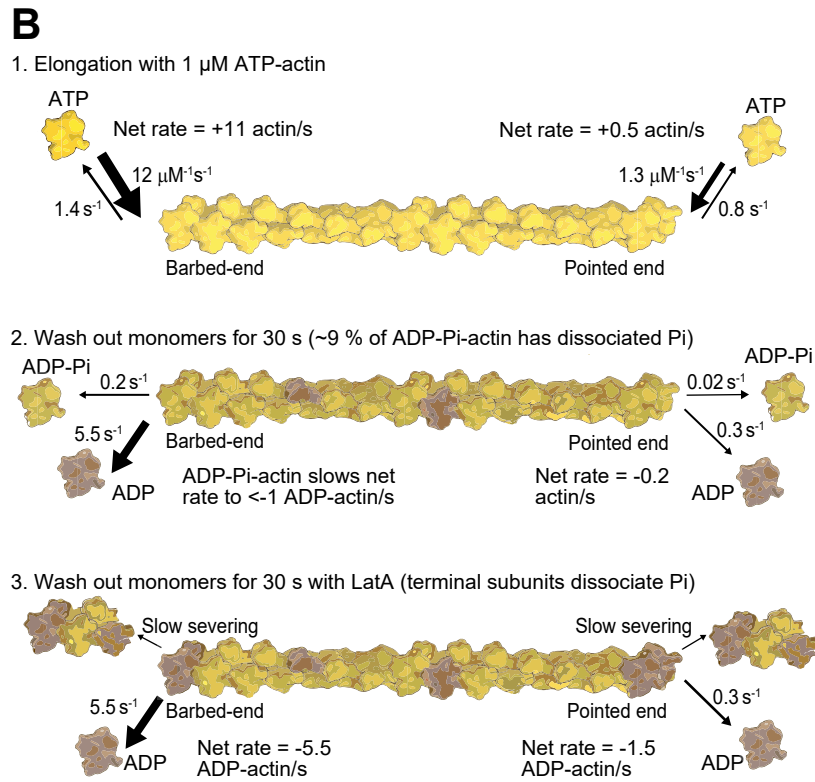

Supplement: NIHMS1507339-supplement-4.pdf [file NIHMS1507339-supplement-4.pdf]
